1 **SARS-CoV-2 Elicits Robust Adaptive Immune Responses Regardless of Disease**

2 **Severity**

3

4 Stine SF Nielsen<sup>1\*</sup>, Line K Vibholm<sup>1\*</sup>, Ida Monrad<sup>1</sup>, Rikke Olesen<sup>1</sup>, Giacomo S Frattari<sup>1</sup>, Marie H Pahuš<sup>2</sup>,

5 Jesper F Højen<sup>1</sup>, Jesper D Gunst<sup>1,2</sup>, Christian Erikstrup<sup>4</sup>, Andreas Holleufer<sup>3</sup>, Rune Hartmann<sup>3</sup>, Lars

6 Østergaard<sup>1,2</sup>, Ole S Sjøgaard<sup>1,2</sup>, Mariane H Schleimann<sup>1</sup>, Martin Tolstrup<sup>1,2</sup>

7

8 Affiliations: 1 Department of Infectious Diseases, Aarhus University Hospital, Denmark; 2 Department of

9 Clinical Medicine, Aarhus University, Denmark; 3 Department of Molecular Biology and Genetics, Aarhus

10 University, Denmark. 4 Department of Clinical Immunology, Aarhus University Hospital, Denmark

11 \* These authors contributed equally to this manuscript

12 Correspondence to Martin Tolstrup: [marttols@rm.dk](mailto:marttols@rm.dk) or Stine SF Nielsen: [stsoni@rm.dk](mailto:stsoni@rm.dk)

13

14 Character count of the manuscript: 42,106 characters / 6072 words

15

16

17

18

19

20

21

## 22 **Abstract**

23 The SARS-CoV-2 pandemic currently prevails worldwide. To understand the immunological signature of  
24 SARS-CoV-2 infections and aid the search for treatments and vaccines, comprehensive characterization of  
25 adaptive immune responses towards SARS-CoV-2 is needed. We investigated the breadth and potency of  
26 antibody-, and T-cell immune responses, in 203 recovered SARS-CoV-2 infected patients who presented  
27 with asymptomatic to severe infections. We report very broad serological profiles with cross-reactivity to  
28 other human coronaviruses. Further, >99% had SARS-CoV-2 epitope specific antibodies, with SARS-CoV-2  
29 neutralization and spike-ACE2 receptor interaction blocking observed in 95% of individuals. A significant  
30 positive correlation between spike-ACE2 blocking antibody titers and neutralization potency was observed.  
31 SARS-CoV-2 specific CD8<sup>+</sup> T-cell responses were clear and quantifiable in 90% of HLA-A2<sup>+</sup> individuals.  
32 The viral surface spike protein was identified as the dominant target for both neutralizing antibodies and  
33 CD8<sup>+</sup> T cell responses. Overall, the majority of patients had robust adaptive immune responses, regardless of  
34 disease severity. These data support the possibility of achieving protective immunity through natural  
35 infection and bode well for the prospects of inducing immunological memory through vaccination.

36 **Keywords:** SARS-CoV-2 infection / COVID-19 / Adaptive immune response / Asymptomatic / Severe

## 37 **Introduction**

38 The year of 2020 has been thoroughly marked by the outbreak of severe acute respiratory syndrome  
39 Coronavirus 2 (SARS-CoV-2)(Zhou *et al*, 2020). Originating in China December 2019, the outbreak was  
40 formally declared a pandemic by the WHO in March 2020 (WHO, 2020a). With more than 30 million cases  
41 confirmed across 200 countries, the virus has claimed more than 1 million lives as of early October 2020  
42 (WHO, 2020b). The SARS-CoV-2 epidemic is an ongoing health crisis, which is extensively affecting  
43 almost all aspects of the global human society. An important aspect of SARS-CoV-2 replication is binding  
44 and infection of the host cell. The viral spike protein receptor binding domain (RBD) interacts with  
45 angiotensin-converting enzyme 2 (ACE2), found on the cell surface, thereby mediating viral infection  
46 (Hoffmann *et al*, 2020; Walls *et al*, 2020). Coronavirus Disease 2019 (COVID-19) symptoms manifest

47 primarily as a respiratory disease, with emergent complications of several organs in cases of severe disease  
48 (Cascella *et al*, 2020). While efforts are converging globally to develop an effective vaccine(WHO, 2020.),  
49 our broader basic understanding of the adaptive immune response towards SARS-CoV-2 is still limited.

50 Several studies have described the general adaptive immune responses towards SARS-CoV-2, showing that  
51 SARS-CoV-2 specific B and T cells are generated during infections. First immunoglobulin (Ig) M and later  
52 IgG SARS-CoV-2 spike specific antibodies are readily detected in COVID-19 patients (Burbelo *et al*, 2020;  
53 Dingens *et al*, 2020; Gudbjartsson *et al*, 2020; Iyer *et al*, 2020; Qu *et al*, 2020). Evaluations by neutralization  
54 assays have confirmed the ability of the generated antibodies to prevent viral infections *in vitro* (Pinto *et al*,  
55 2020; Rogers *et al*, 2020; Wu *et al*, 2020). The limited evidence on individuals suffering reinfections post  
56 recovery (Kirkcaldy *et al*, 2020), and immunity against viral re-challenge shown *in vivo* in macaque  
57 challenge studies (Chandrashekar *et al*, 2020), suggest that the immunological response developed during  
58 primary infections provide at least some protection against reinfection. Additionally, SARS-CoV-2 specific  
59 T-cell activation has also been documented (Le Bert *et al*, 2020; Sekine *et al*, 2020; Zhang *et al*, 2020).  
60 However, these studies have been limited to specific disease severity populations, and small or none RT-  
61 PCR verified cohorts.

62 Currently, in depth characterization of the adaptive immune response to SARS-CoV-2 in a large cohort  
63 representing the full disease spectrum, as well as the development of functional, and easily scalable,  
64 serological assays, are needed to guide and support rapid vaccine development. Here, we have delineated the  
65 humoral and cellular immune responses in 203, RT-PCR verified, recovered SARS-CoV-2 patients. We  
66 evaluated the quantity and potency of antibodies in each individual towards several different coronaviruses  
67 and antigens, using both a SARS-CoV-2 spike pseudovirus neutralization assay and a novel Mesoscale  
68 Diagnostics (MSD) multiplex platform (Johnson *et al*, 2020). We further quantified the breadth and  
69 magnitude of single-epitope SARS-CoV-2 specific CD8<sup>+</sup> T cells, using dextramer flow cytometry. Thus, we  
70 report an extensive panel of adaptive immune parameters in the context of disease severity, to provide an  
71 outline of the general broad and functional SARS-CoV-2 specific adaptive immune response observed across  
72 the full COVID-19 disease spectrum.

## 73 **Results**

### 74 **Patient enrollment**

75 We studied the adaptive immune response towards SARS-CoV-2 among 203 patients who had recovered  
76 from COVID-19. We have recently described the cohorts clinical characteristics thoroughly (Vibholm *et al*,  
77 Submitted Oct. 2020) a basic overview of which is shown in table 1. The median age of individuals was 47  
78 years (range: 21 – 79), and 45% were female. The cohort was divided into three COVID-19 disease severity  
79 groups. 1: Home/outpatients with no limitation of daily activities (8%), 2: Home/outpatients with a limitation  
80 of daily activities (75%), and 3: Hospitalized patients (17%). The median duration of COVID-19 symptoms  
81 was 13 days (range: 0 – 68). Enrollment occurred at least 14 days after the end of COVID-19 related  
82 symptoms, with a median of 31 (range: 14 – 61) days from time of recovery to study enrollment. To allow  
83 comparison of immunological outcomes from SARS-CoV-2 infection recovered patients, samples from 10  
84 healthy individuals enrolled in a study conducted prior to the current COVID-19 pandemic were included as  
85 controls (Højen *et al*, 2015).

### 86 **Human coronavirus serology**

87 First, we analyzed the presence of IgG antibodies towards multiple human coronaviruses in serum, using the  
88 multiplex MSD platform. Compared to controls, we found significantly elevated levels of IgG antibodies in  
89 spike RBD, spike N-terminal domain (NTD), and the nucleocapsid ( $p < 0.0001$ , Fig 1A). Furthermore, IgG  
90 antibodies from SARS-CoV-2 infected individuals exhibited strongly increased reactivity towards spike  
91 protein from other human beta coronaviruses: SARS-CoV-1 and Middle East respiratory syndrome (MERS),  
92 as compared to the controls. Further, increased IgG levels towards the seasonal alpha coronavirus strains:  
93 HKU1 and OC43, compared to IgG from the control group were also observed ( $p < 0.0001$ , Fig 1B). No  
94 difference was detected in IgG levels to the negative bovine serum albumin (BSA) control between SARS-  
95 CoV-2 patients and controls. Importantly, 202 out of the 203 individuals analyzed here, developed detectable  
96 antibodies, otherwise absent in the historical controls, against both full-length SARS-CoV-2 Spike and RBD  
97 antigens, during SARS-CoV-2 infections. Likewise, robust production of IgA antibodies was also observed

98 for nearly all infected individuals, with SARS-CoV-2 spike specific IgA levels being significantly elevated  
99 compared to controls in 201 of the 203 individuals (Fig 1C). Additionally, SARS-CoV-2 IgG levels towards  
100 both spike and nucleocapsid antigens, correlated positively with the disease severity. (Fig 1D+E). Overall,  
101 we conclude that more than 99% of the SARS-CoV-2 infected individuals in this cohort had readily  
102 detectable antibodies to SARS-CoV-2 spike antigen, and that broad IgG immunological recognition of  
103 SARS-CoV-2 with cross-reactivity to several different coronavirus develops during COVID-19.  
104 Additionally, the magnitude of spike-targeting antibodies increases with disease severity.

### 105 **SARS-CoV-2 pseudovirus neutralization**

106 Next, we investigated the functional neutralization capacity of total plasma antibodies *in vitro*, using VSV  
107 pseudotyped virus expressing SARS-CoV-2 spike protein. Antibody neutralizing potency was evaluated by  
108 serial dilutions of plasma, yielding infectivity titration curves for each of the SARS-CoV-2 infected  
109 individuals and the controls (Fig 2A). We found that 95.5% of the individuals (193 of 202) were able to  
110 neutralize SARS-CoV-2 spike pseudoviruses and provided 100% inhibition at the lowest (1:25) plasma  
111 dilution. IC<sub>50</sub> values were extrapolated from the neutralization curves, and assigned to each individual as a  
112 measure of antibody neutralization potency. Serum from the remaining nine individuals (4.5%) were unable  
113 to fully neutralize viral infection, producing neutralization curves comparable to that of the uninfected  
114 controls. No legitimate IC<sub>50</sub> value could be calculated for these individual, and consequently they were  
115 excluded from further analyses using this parameter. Collectively, the IC<sub>50</sub> values of all 193 neutralizing  
116 individuals span evenly across four orders of magnitude (Fig 2B). In concurrence with the analysis in Fig  
117 1D+E, we observed lower IC<sub>50</sub> values among individuals experiencing mild symptoms compared to those  
118 with moderate ( $p < 0.001$ ) or severe COVID-19 ( $p < 0.0001$ ) (Fig 2C). We conclude that in this large cohort,  
119 with considerable diversity in disease severity, the vast majority (>95 %) of SARS-CoV-2 infections lead to  
120 the production of effective neutralizing antibodies, and that neutralization potency increases with disease  
121 severity.

122

123

## 124 **Antibodies efficiently block ACE2 receptor binding**

125 We continued the characterization of SARS-CoV-2 antibody functionality, using an MSD SARS-CoV Spike  
126 – ACE2 competition assay (Fig 3A). This allowed us to measure the quantity of antibodies able to block the  
127 interaction between the ACE2 receptor and SARS-CoV-2 full-length spike protein, SARS-CoV-2 RBD, and  
128 SARS-CoV-1 spike protein. Many of the recovered individuals reached the assay's upper limit of  
129 quantification, and a clear increase in the quantities of serum ACE2 blocking antibodies was observed for all  
130 three antigens compared to historic controls ( $p \leq 0.0001$ ) (Fig 3B). The levels of antibodies blocking SARS-  
131 CoV-2 Spike – ACE2 receptor interaction was increased in >99% of the individuals (202 of 203) compared  
132 to uninfected controls. The individual antibody concentrations also correlated to the time from disease  
133 recovery to inclusion (Appendix Fig 1). Nevertheless, we found that those experiencing severe COVID-19  
134 had significantly greater levels of SARS-CoV-2 spike specific ACE2 blocking antibodies, compared to  
135 individuals with mild to moderate disease ( $p < 0.0001$ , Fig 3C). Both the pseudovirus cell-based neutralization  
136 assay and the SARS-CoV Spike – ACE2 competition assay investigate the presence of functional antibodies  
137 towards SARS-CoV-2. We identified a highly significant correlation between the IC50 values from the  
138 pseudovirus neutralization assay and the concentration of SARS-CoV-2 spike specific antibodies capable of  
139 blocking ACE2 receptor interaction ( $p > 0.0001$  Fig 3D). In conclusion, we observed that nearly all  
140 individuals produce antibodies that target the spike protein-ACE2-receptor interaction and that the level of  
141 these antibodies was increased with severe disease. Further, the virus neutralization capacity increased in  
142 conjunction with the amount of functional ACE2 blocking antibody present in serum.

## 143 **Collected serological analysis**

144 Next, we constructed a heatmap compiling all humoral immunological data, to gain a cohort wide  
145 perspective of the overall antibody response developed during SARS-CoV-2 infection. We ranked  
146 individuals according to their antibody response potency from the pseudovirus neutralization assay (IC50  
147 value), displaying their respective immunological variables underneath (Fig 4). We observed, that the

148 neutralization capacity was clearly linked to the overall antibody levels present in the patients. Interestingly,  
149 it was further evident, that the best (top 10%) neutralizers of the cohort displayed a corresponding increase in  
150 the overall breadth of their antibody response, towards all the investigated coronavirus antigens. Importantly,  
151 strong pseudovirus neutralization profiles were almost exclusively seen in individuals with antibodies that  
152 potently block spike-ACE2 receptor interaction. We therefore conclude that the best neutralizers exhibit a  
153 broader variety of cross-reactive antibodies and have greater levels of spike binding and receptor-blocking  
154 antibodies.

### 155 **Epitope specific CD8<sup>+</sup> T cell-responses**

156 We then went on to explore the epitope specific T-cell responses in SARS-CoV-2 recovered individuals. We  
157 analyzed the reactivity of CD8<sup>+</sup> T cells from 106 HLA-A2<sup>+</sup> individuals in the cohort for their specificity to  
158 nine different SARS-CoV-2 epitopes using dextramer staining flow cytometry (Fig 5A). Overall,  
159 Membrane<sub>e61-70</sub> (M) (epitope 1), Nucleocapsid<sub>222-230</sub> (N) (epitope 3), and Spike<sub>269-277</sub> (S) (epitope 6) were the  
160 most commonly recognized epitopes with positive responses detected in 17%, 25% and 81% of individuals,  
161 respectively (Fig 5B). Interestingly, these three epitopes originate from three separate SARS-CoV-2 proteins  
162 (Fig 5A). The frequency of SARS-CoV-2 specific CD8<sup>+</sup> T-cells was similar across all nine HLA-A2<sup>+</sup>  
163 epitopes tested, with the highest individual responses observed for N<sub>222-230</sub> and S<sub>269-277</sub> (epitopes 3 and 6) (Fig  
164 5C). Only 10% of the HLA-A2<sup>+</sup> individuals (11 of 106) had no detectable response to any of the epitopes  
165 tested, while the remaining 90% responded to at least one, and up to seven, of the analyzed epitopes. (Fig  
166 5D). We compared the cumulative frequency of SARS-CoV-2 specific CD8<sup>+</sup> T cells across the disease  
167 severity groups and observed no significant difference (Fig 5E). However, we did observe significant albeit  
168 weak correlations between the cumulative frequency of SARS-CoV-2 specific CD8<sup>+</sup> T-cells and the majority  
169 of the serological immunological parameters analyzed, including pseudovirus neutralization IC50 values as  
170 well as SARS-CoV-2 specific antibody production and ACE2 blocking ability, as outlined with correlation  
171 coefficients in table 2. The 11 individuals with no detectable CD8<sup>+</sup> T-cell responses were evenly distributed  
172 among the disease severity groups and displayed varying antibody neutralization capacity (Appendix Fig 3).  
173 Based on this we were only able to identify two individuals with both no detectable neutralizing antibodies

174 and no detectable CD8<sup>+</sup> T-cell responses. Thus, we conclude that 90% of SARS-CoV-2 infected individuals  
175 mount a detectable CD8<sup>+</sup> T cell response, towards the nine epitopes tested, irrespectively of disease severity.  
176 We further conclude that the broadest targeted epitope in this cohort is located in the spike protein. Lastly,  
177 there is an overall weak but statistically significant correlation of antibody responses and CD8<sup>+</sup> T-cell  
178 responses.

## 179 **Discussion**

180 We aimed to characterize the cellular and humoral adaptive immune response in a large cohort of RT-PCR  
181 verified SARS-CoV-2 recovered patients, spanning a full spectrum of COVID-19 severity. Overall, our  
182 results show that the majority of patients developed a robust and broad both humoral and cellular immune  
183 response to SARS-CoV-2. However, our data may also help explain that some rare individuals have no  
184 detectable immunological memory to SARS-CoV-2, and will therefore be at risk of re-infection as it has  
185 been reported in a few case reports.

186 We were able to detect SARS-CoV-2 specific antibodies in all but one of the 203 individuals investigated,  
187 irrespectively of their disease severity and duration of symptoms. Antibody specificity was distributed across  
188 several SARS-CoV-2 antigens, and with cross coronavirus serological activity observed against SARS-CoV-  
189 1, MERS, HKU1, and OC43 human coronaviruses. We assume this reflects cross-reactivity of the antibodies  
190 generated against SARS-CoV-2 for two reasons: First, due to the clear significant difference to the pre-  
191 pandemic controls, and secondly because there have been no documented cases of SARS-CoV-1 or MERS in  
192 Denmark. We interpret this as an indication of extensive and broad immune recognition development in  
193 COVID-19 patients. Similar to previous studies (Robbiani *et al*, 2020; Wu *et al.*, 2020), we confirmed the  
194 functionally neutralizing and ACE2 blocking capabilities of the SARS-CoV-2 spike and RBD specific  
195 antibodies. Noticeably, this infers the development of a robust humoral immune response within the vast  
196 majority of the COVID-19 recovered population. Furthermore, nearly all individuals also have SARS-CoV-2  
197 specific IgA responses, clearly indicating a functional rigorous class switching and maturation. This may  
198 result in potent anti-viral activity within mucosal membranes, providing an enhanced protection at mucosal  
199 barriers during potential future SARS-CoV-2 exposures.



200 All serological and functional data collected show that both antibody levels and neutralization potency  
201 correlate significantly with the disease severity. This indicates that severe disease manifestation is not caused  
202 by a lack of adaptive immunity, which is in line with previous reports (Long *et al.*, 2020a; Long *et al.*, 2020b).  
203 Hence, we suggest that the prolonged disease course, and larger exposure to virus experienced in  
204 hospitalized patients, may provide a timeframe in which enhanced antibody affinity maturation takes place,  
205 compared to shorter course mild infections.

206 Studies are conflicted on the degree to which cross-reactive immunity between different coronavirus develop  
207 during SARS-CoV-2 infections (Iyer *et al.*, 2020; Ju *et al.*, 2020; Long *et al.*, 2020a; Lv *et al.*, 2020; Pinto *et*  
208 *al.*, 2020; van der Heide, 2020; Wu *et al.*, 2020). The considerable diversity of antigen recognition  
209 independent of COVID-19 severity shown here, demonstrates that at least some immunological cross-  
210 recognition of several different coronavirus is developed during SARS-CoV-2 infections. This is in line with  
211 data on cross-reactivity in CD4<sup>+</sup> T-cell epitopes between seasonal coronaviruses and SARS-CoV-2 (Mateus  
212 *et al.*, 2020). The cross-reactivity observed between SARS-CoV-2, SARS-CoV-1 and MERS, may be due to  
213 conserved epitopes between these viruses, as prior infections with SARS-CoV-1 or MERS within our cohort  
214 are highly unlikely. Such potential cross-reactivity could arise through either newly generated SARS-CoV-2  
215 specific antibodies reacting with conserved epitopes, or by reactivation of memory cells originally generated  
216 against seasonal coronaviruses, followed by affinity maturation. Importantly, the multiplex serological  
217 analyses we performed do not provide insight into the SARS-CoV-2 antibody response on a monoclonal  
218 antibody level. Here, further studies are needed to determine possible protective and cross-reactive properties  
219 of single-antibody specificities.

220 We functionally verified the antibody responses in all individuals, using two separate assays. The cell-based  
221 pseudovirus neutralization assays are at present the standard method for determining SARS-CoV-2  
222 neutralizing antibody potency. We additionally used the MSD novel coronavirus multiplex assay, recently  
223 reported by Johnson *et al.* (Johnson *et al.*, 2020) to determine the ACE2 blocking capability of individual  
224 serum antibodies. The significant correlation between the two assay readouts identifies the plate format  
225 ACE2 competition assay as a powerful, high-throughput, screening tool, with applications in both SARS-

226 CoV-2 therapeutic neutralizing antibody development, and assessments of functional protective antibody  
227 induction in vaccine studies. An immense global effort is currently undertaken to develop effective vaccines  
228 against SARS-CoV-2, the majority of which are centered on inducing spike or RBD antigen specific  
229 immunity (Alturki *et al*, 2020). Here we demonstrate that SARS-CoV-2 spike specific, ACE2 blocking  
230 antibodies are found in the majority of infected individuals. Their extensive induction, even in short-term,  
231 asymptomatic infections encourages the feasibility of inducing protective immunity based on spike antigens,  
232 through vaccination.

233 We further report, with single-epitope resolution, a SARS-CoV-2 specific CD8<sup>+</sup> T-cell response in 90% of  
234 the HLA-A2<sup>+</sup> individuals analyzed. This corresponds well with other studies reporting CD8<sup>+</sup> T cell activation  
235 in 70%–100% of recovered patients using full protein overlapping peptide stimulation (Grifoni *et al*, 2020;  
236 Sekine *et al.*, 2020). The location of the top three immunogenic epitopes within separate proteins in the viral  
237 proteome additionally reinforces our conclusion that a broad immune response is generated towards SARS-  
238 CoV-2 in the general infected population. As T-cell immunity to SARS-CoV-1 is known to persist for a  
239 more than a year (Yang *et al*, 2006), this supports the feasibility of developing protective cell based  
240 immunity to SARS-CoV-2 through primary exposure. As an important point, the most broadly recognized  
241 CD8<sup>+</sup> T-cell epitope (S<sub>269-277</sub>) within our cohort (responses detected in 81% of HLA-A2<sup>+</sup> individuals) is  
242 located in the spike antigen. Thus, such epitope specificity can clearly be used to evaluate CD8<sup>+</sup> T-cell  
243 immunity in spike focused vaccine developments currently underway.

244 Surprisingly, we found that the cumulative CD8<sup>+</sup> T-cell response, across all epitopes, did not vary by disease  
245 severity in contrast to what we, and others (Peng *et al*, 2020), observed with antibody levels. While the  
246 limited coverage of epitopes investigated here may influence this observation, recent evidence suggests that  
247 persistent viral replication in otherwise recovered patients may be linked to CD8<sup>+</sup> T-cell response magnitude  
248 (Vibholm *et al.*, Submitted Oct. 2020). Despite the different observations with regard to immune responses  
249 and disease severity, we found overall significant relationships between humoral and T-cell based immunity,  
250 but all of modest strength. A possible explanation could be a synchronized waning of the magnitude of  
251 response for both immune parameters during the time from recovery to study enrollment.

252 Of note, the use of dextramer staining is limited by inclusion of selected epitopes only, and conclusions are  
253 consequently limited to the relative low epitope coverage. However, the advantages of the dextramer  
254 technology are superior sensitivity and a high degree of specificity. In the light of the relative low proteome  
255 coverage, the fact that only 10% of the investigated individuals did not have a detectable CD8<sup>+</sup> T-cell  
256 response clearly indicate a strong cytotoxic T-cell component in the immune response towards SARS-CoV-  
257 2. Furthermore, as our observations of breadth and magnitude in relation to the distribution of distinct SARS-  
258 CoV-2 antigens are similar to others (Grifoni *et al.*, 2020; Peng *et al.*, 2020) we conclude that the panel of  
259 dextramers applied here provide a new and sensitive representation of the general CD8<sup>+</sup> T-cell response to  
260 SARS-CoV-2 that will be an important tool in assessing long-term immunity following infection or  
261 vaccination.

262 In conclusion, we observed that disease severity is closely related to the potency and breadth of the antibody  
263 response towards SARS-CoV-2. Furthermore, we identified the SARS-CoV-2 spike protein as a target of  
264 adaptive immunity in >99% of the cohort, irrespective of COVID-19 symptom manifestation. Only two  
265 individuals (<2%) had neither antibodies with virus neutralization capacity, nor detectable CD8<sup>+</sup> T-cell  
266 responses. Hence, we conclude that regardless of COVID-19 severity, a robust adaptive immune response  
267 towards SARS-CoV-2 is elicited during primary infections. This adaptive immune response will likely  
268 develop into robust long-term immune memory and therefore decrease the severity of a potential subsequent  
269 infection as well as the risk of multiple infections.

## 270 **Materials and Methods**

### 271 **Study design and sample collection**

272 Samples were collected from a cohort of 203 individuals who had recovered from COVID-19. Participants  
273 were enrolled at Department of Infectious Diseases at Aarhus University Hospital, Denmark from April 3<sup>rd</sup> to  
274 May 29<sup>th</sup> 2020. Inclusion criteria were as follows; 1) Age above 18 years; 2) PCR verified SARS-CoV-2  
275 within the preceding 12 weeks; 3) Full recovery from acute COVID-19 illness; 4) Able to give informed  
276 consent. Exclusion criteria were; 1) Ongoing febrile illness; 2) Immunosuppressive treatment and/or known

277 immunodeficiency; 3) Pregnancy. Samples were collected at least 14 days after recovery and a maximum of  
278 12 weeks after SARS-CoV-2 PCR-verified diagnosis. One patient ID116 only had serum collected, and thus  
279 is absent from IC50 and T-cell analyses.

280 Individuals were allocated to three groups according to the severity of COVID-19 illness, based on the  
281 criteria: 1) Home/outpatient, not experiencing any limitations in daily activities; 2) Home/outpatient, certain  
282 limitations in daily activity level (fever, bedridden during illness); 3) All hospitalized patients, regardless of  
283 need for supplemental oxygen treatment, or ICU admission with/without mechanical ventilation. Additional  
284 data regarding demographic and clinical characteristics of this cohort has been reported elsewhere (Vibholm  
285 *et al.*, Submitted Oct. 2020).

## 286 **Serology**

287 IgG antibodies were measured in serum samples using the MSD Coronavirus Plate 1 Cat. No. N05357A-1,  
288 MesoScale Discovery, Rockville, Maryland), a solid phase multiplex immunoassay, with 10 pre-coated  
289 antigen spots in a 96-well format, with an electro-chemiluminescence based detection system. The SARS-  
290 CoV-2 related antigens spotted were CoV-2 Spike, CoV-2 RBD, CoV-2 NTD, and CoV-2 nucleocapsid. The  
291 remaining spots comprised antigens from other respiratory pathogens: Spike protein from SARS-CoV-1,  
292 MERS coronavirus, and two seasonal coronaviruses OC43, HKU1. BSA served as negative control, as  
293 previously described (Johnson *et al.*, 2020). Unspecific antibody binding was blocked using MSD Blocker A  
294 (Cat. No. R93AA-1). COVID-19 patient serum samples and control samples were diluted 1:4630 in MSD  
295 Diluent 100 (Cat. No. R50AA-3). After sample incubation, bound IgG was detected by incubation with MSD  
296 SULFO-TAG Anti-Human IgG Antibody and subsequently measured on a MESO QuickPlex SQ 120 Reader  
297 (Cat. No. AI0AA-0) after addition of GOLD Read Buffer B (Cat. No. R60AM-2).

## 298 **ACE2 Competition Assay**

299 Spike and RBD targeting antibodies with the ability to compete with ACE2 binding were measured using the  
300 MSD Coronavirus Plate 1. COVID-19 blocking antibody calibrator and 1:10 diluted patient and control  
301 serum samples were incubated after plate blocking. SULFO-Tag conjugated ACE2 was added before

302 washing, allowing ACE2 to compete with antibody binding to spike and RBD antigens immobilized on the  
303 plate. Bound ACE2 was detected as described for the serology assay above, and antibody concentrations  
304 were subsequently calculated using the MSD Discovery Workbench software.

### 305 **ELISA**

306 IgA antibodies were measured using the Anti-SARS-CoV-2 IgA ELISA from Euroimmun (Euroimmun  
307 Medizinische Labordiagnostika AG, Lübeck, Germany, Cat. No. El 2606-9601 A), according to  
308 manufacturer's instructions. In brief, antibodies in serum samples diluted 1:200 were captured by  
309 recombinant S1 domain of SARS-CoV-2 spike protein immobilized in microplate wells. IgA type antibodies  
310 were detected by incubation with peroxidase labelled anti-human IgA followed by a chromogen solution,  
311 resulting in color development in positive wells. Signal was read at 450 nm with reference measurements at  
312 650 nm, which were used for background signal corrections. Results were analyzed relative to the ELISA kit  
313 calibrator, as a ratio between sample absorbance and calibrator absorbance.

### 314 **Cells and plasmids**

315 All cell lines were incubated at 37 °C and 5 % CO<sub>2</sub> in a humidified atmosphere. BHK-G43, previously  
316 described (Berger Rentsch & Zimmer, 2011; Hanika *et al*, 2005), were cultured in Dulbecco's modified  
317 eagle's medium (DMEM), containing 5 % Fetal Bovine Serum (FBS) and 50 U/mL Penicillin  
318 G/Streptomycin (P/S), where Zeocin (100µg/ml) and Hygromycin (50µg/ml) were added at every fourth  
319 passage. Induction of VSV-G glycoprotein was performed with 10<sup>-8</sup>M mifepristone. HEK293T cells were  
320 cultured in DMEM, containing 10% FBS and 50 U/mL P/S. Vero76 myc hTMPRSS2 (Hoffmann *et al.*,  
321 2020) cells were cultured in DMEM supplemented with 10% FBS, 50 U/mL P/S, and 10 µg/mL Blasticidin.

322 The construction of pCG1-SARS-2-Spike has been previously described (Hoffmann *et al.*, 2020; Hoffmann  
323 *et al*, 2013). Briefly, SARS-2-S (NCBI Ref.Seq: YP\_009724390.1) coding sequence was PCR-amplified and  
324 cloned into the pCG1 expression vector via BamHI and XbaI restriction sites.

### 325 **Virus production**

326 For generation of VSV\* $\Delta$ G(luc)-G particles BHK-G43 cells were seeded day 1 to reach a confluence of 70-  
327 80% at day 2, where Mifepristone ( $10^{-8}$  M) was added to induce transcription of glycoprotein G. After 6  
328 hours the medium was replaced with fresh DMEM containing 5% FBS, 50 U/mL P/S, and VSV\* $\Delta$ G(luc) at  
329 MOI = 0.3. After 1 hour of incubation at 37°C BHK-G43 cells were washed three times in PBS and fresh  
330 media was added. Cells were incubated for 24 hours, after which the supernatant was centrifuged at 2000 xg  
331 for 10 min at room temperature to pellet cellular debris, and stored at -80 °C.

332 VSV\* $\Delta$ G(luc)-SARS-2-S pseudovirus was produced by transfection with pCG1-SARS-2-S followed by  
333 transduction with VSV\* $\Delta$ G(luc)-G. HEK293T cells were seeded in DMEM containing 10% FBS and 50  
334 U/mL P/S to reach 70-80% confluence the next day. 2  $\mu$ g plasmid was used per  $1 \times 10^6$  cells and incubated  
335 with PEI (3:1) for 30 min at room temperature. The transfection mixture was added to the cells, and  
336 incubated for 18 hours at 37 °C. Cells were washed twice with PBS, transduced with VSV\*(luc)+G at MOI =  
337 2, and incubated for 2 hours. The virus was removed by gently washing with PBS twice, and fresh DMEM  
338 containing 10% FBS and 50 U/mL P/S was added. Cell supernatant was harvested after 24 hours, centrifuged  
339 at 2000 xg for 10 min to eliminate cellular debris, and stored at -80 °C immediately. A VSV\* $\Delta$ G(luc)-mock  
340 was generated simultaneously to allow subtraction of any remaining background from VSV\* $\Delta$ G(luc)-G  
341 signals.

#### 342 **Neutralization Assay**

343 The SARS-CoV-2 neutralization capacity of plasma was assessed through infection of Vero76 cmcy  
344 hTMPRSS2 cells, with VSV\* $\Delta$ G(luc)-SARS-2-S pseudovirus particles. Neutralization was conducted as  
345 follows: Plasma samples were thawed and heat-inactivated at 56 °C for 45 min. Subsequently, five-fold  
346 serial dilution in DMEM containing 10% FBS and 50 U/mL P/S were made. 25  $\mu$ L of each plasma dilution  
347 was incubated with 50  $\mu$ L VSV\* $\Delta$ G(luc)-SARS-2-S at MOI = 0.01 in duplicates, for 1 hour at 37 °C, in a flat  
348 bottomed 96-well plate. Successively, 20,000 Vero76 cmcy hTMPRSS2 cells, in 50  $\mu$ L DMEM containing  
349 10% FBS and 50 U/mL P/S were added to each well, and incubated at 37 °C for 20 hours. Cells were  
350 prepared for flow cytometry by gently removing the culture media, and washing once with PBS. Cell  
351 suspensions were made by incubating each well with 75  $\mu$ L Trypsin + 0.02% EDTA for 15 min at 37 °C,

352 followed by centrifugation at 500 g for 5 min at room temperature, and re-suspension in DMEM containing  
353 10% FBS and 50 U/mL P/S. Cells were fixed in 1% PFA for at least 15 min at 4 °C, before eGFP expression  
354 was analyzed using a Miltenyi Biotec MACSquant16 flow cytometer. The VSV\*ΔG(luc)-mock eGFP  
355 background signal was subtracted from all samples.

### 356 **HLA-A2 typing and dextramer staining by flow cytometry**

357 For HLA-A2 typing cryopreserved PBMCs were thawed, stained at room temperature for 20 min with HLA-  
358 A2 (clone BB7.2, Biolegend Cat. No. 343328) or matching isotype control (Biolegend Cat. No. 400356) and  
359 acquired on a five-laser Fortessa flow cytometer. The dextramer stains were then performed on the HLA-A2  
360 positive samples as follows. PBMCs were incubated at room temperature for 30 min with the following  
361 SARS-CoV-2 dextramers (all from Immudex): A\*0201/TLACFVLA AV-PE (Cat. No. WB3848-PE),  
362 A\*0201/GMSRIGMEV-FITC (Cat. No. WB5751-FITC), A\*0201/LLLDRLNQL-APC (Cat. No. WB5762-  
363 APC), A\*0201/ILLNKHIDA-PE (Cat. No. WB5848-PE), A\*0201/RLNEVAKNL-FITC (Cat. No. WB5750-  
364 FITC), A\*0201/YLQPRTFLL-APC (Cat. No. WB5824-APC), A\*0201/VLNDILSRL-PE (Cat. No.  
365 WB5823-PE), A\*0201/NLNESLIDL-FITC (Cat. No. WB5850-FITC), A\*0201/FIAGLIAIV-APC (Cat. No.  
366 WB5825-APC), A\*0201/LLLNCLWSV-PE (Cat. No. WB3513-PE), or positive/negative control  
367 dextramers: A\*0201/NLVPMVATV-PE (Cat. No. WB2132-PE, Pos. Control, CMV),  
368 A\*0201/NLVPMVATV-FITC (Cat. No. WB2132-FITC, Pos. Control, CMV), A\*0201/NLVPMVATV-APC  
369 (Cat. No. WB2132-APC, Pos. Control, CMV), A\*0201/Neg. Control-PE (Cat. No. WB2666-PE),  
370 A\*0201/Neg. Control-FITC (Cat. No. WB2666-FITC), A\*0201/Neg. Control-APC (Cat. No. WB2666-  
371 APC). Cells were washed and stained with viability dye (Zombie Violet, Biolegend, Cat. No. 423114) and  
372 CD8 (Clone RPA-T8, BD, Cat. No. 563795) and acquired on a five-laser Fortessa flow cytometer.

### 373 **Data and Statistical analyses**

374 Flow cytometry data was analyzed using FlowJo (Version 10.7.1). All data was processed and graphed in  
375 GraphPad Prism version 8.4.3. Mann-Whitney U t-test was used to compare between different groups.  
376 Spearman's rank correlation analysis was used to assess the correlation between variables as specified.

377 Neutralization curves were plotted with three parameter non-linear fits, from which IC50 values were  
378 calculated.  $p \leq 0.05$  was interpreted as statistically significant. P-values are indicated as follows: n.s. = not  
379 significant, \* =  $p \leq 0.05$ , \*\* =  $p < 0.01$ , \*\*\* =  $p < 0.001$ , \*\*\*\* =  $p < 0.0001$ .

380

### 381 **Acknowledgements**

382 We would like to thank all the individuals in the study for the kind donation of both their time and biological  
383 material. Thank you to MesoScale Discovery, for providing the reagents and materials to enable this study.  
384 Thank you to Markus Hoffmann and Stefan Pöhlmann for the kind gift of BHK-G43 and Vero76 cmc  
385 hTMPRSS2 cells and the pCGI-SARS-2-spike plasmid. Figure 5A was created with the help of  
386 BioRender.com. We thank Lene Svinth Jønke for her immense assistance in the laboratory during patient  
387 material collection. Thank you, to the entire staff of the Department of Infectious Diseases, for their feedback  
388 and scientific discussions.

### 389 **Author contributions**

390 SFN, LKV, MT, MHS, OSS, LØ contributed to study design, data collection, data analysis, data  
391 interpretation, literature search, and the writing of this report. IMJ, RO, GSF, MHP, CE, AH, and RH  
392 contributed to experiments, data analysis, and data interpretation. JFH, JDG and LKV contributed to  
393 individual recruitment, data collection and clinical management. The final version of this paper was  
394 reviewed and approved by all authors.

### 395 **Conflicts of interest**

396 The authors declare no conflicts of interest

### 397 **The paper explained**

### 398 **Problem:**



399 SARS-CoV-2 can cause severe and deadly infections. However, the immunological understanding of this  
400 viral infection is limited. Currently, no vaccine is available to limit transmission and prevent the current  
401 pandemic. Basic understanding of the adaptive immune response developed during SARS-CoV-2 infections  
402 is needed to inform vaccine development and to understand protective immunity.

403

#### 404 **Result:**

405 We enrolled 203 SARS-CoV-2 RT-PCR verified individuals 14 days after complete recovery, to investigate  
406 the adaptive immune response developed during SARS-CoV-2 infections. The cohort represented the full  
407 spectrum of disease severity, from asymptomatic infections to severe cases requiring hospitalization. We  
408 used a novel multiplex serological platform, *in vitro* neutralization and dextramer flow cytometry assays to  
409 characterize a broad and robust humoral and cellular immune response developed towards SARS-CoV-2. We  
410 found that the vast majority of SARS-CoV-2 recovered individuals have clear detectable and functional  
411 SARS-CoV-2 spike specific adaptive immune responses, despite diverse disease severities.

#### 412 **Impact:**

413 Our study provides an in-depth overview of the immune response generated within a broad disease severity  
414 spectrum of SARS-CoV-2 infections. The detection of both a humoral and cellular functional spike specific  
415 immune response in the vast majority of the individuals, irrespective of asymptomatic manifestations,  
416 supports the current vaccine development efforts underway, and is encouraging for the prospects of  
417 achieving long term immune memory following natural infections.

#### 418 **For more information**

419 NA

#### 420 **References**

421

422 Alturki SO, Alturki SO, Connors J, Cusimano G, Kutzler MA, Izmirly AM, Haddad EK (2020) The 2020  
423 Pandemic: Current SARS-CoV-2 Vaccine Development. 11

424 Berger Rentsch M, Zimmer G (2011) A Vesicular Stomatitis Virus Replicon-Based Bioassay for the Rapid and  
425 Sensitive Determination of Multi-Species Type I Interferon. *PloS one* 6: e25858

426 Burbelo PD, Riedo FX, Morishima C, Rawlings S, Smith D, Das S, Strich JR, Chertow DS, Davey RT, Jr, Cohen JI  
427 (2020) Sensitivity in Detection of Antibodies to Nucleocapsid and Spike Proteins of Severe Acute  
428 Respiratory Syndrome Coronavirus 2 in Patients With Coronavirus Disease 2019. *The Journal of Infectious*  
429 *Diseases* 222: 206-213

430 Cascella M, Rajnik M, Cuomo A, Dulebohn SC, Di Napoli R (2020) Features, Evaluation, and Treatment of  
431 Coronavirus (COVID-19). In: *StatPearls*, StatPearls Publishing. Copyright © 2020, StatPearls Publishing LLC.:  
432 Treasure Island (FL)

433 Chandrashekar A, Liu J, Martinot AJ, McMahan K, Mercado NB, Peter L, Tostanoski LH, Yu J, Maliga Z,  
434 Nekorchuk M *et al* (2020) SARS-CoV-2 infection protects against rechallenge in rhesus macaques. 369: 812-  
435 817

436 Dingens AS, Crawford KHD, Adler A, Steele SL, Lacombe K, Eguia R, Amanat F, Walls AC, Wolf CR, Murphy M  
437 *et al* (2020) Serological identification of SARS-CoV-2 infections among children visiting a hospital during the  
438 initial Seattle outbreak. *Nature communications* 11: 4378

439 Grifoni A, Weiskopf D, Ramirez SI, Mateus J, Dan JM, Moderbacher CR, Rawlings SA, Sutherland A,  
440 Premkumar L, Jadi RS *et al* (2020) Targets of T Cell Responses to SARS-CoV-2 Coronavirus in Humans with  
441 COVID-19 Disease and Unexposed Individuals. *Cell* 181: 1489-1501.e1415

442 Gudbjartsson DF, Norddahl GL, Melsted P, Gunnarsdottir K, Holm H, Eythorsson E, Arnthorsson AO,  
443 Helgason D, Bjarnadottir K, Ingvarsson RF *et al* (2020) Humoral Immune Response to SARS-CoV-2 in Iceland.

444 Hanika A, Larisch B, Steinmann E, Schwegmann-Weßels C, Herrler G, Zimmer G (2005) Use of influenza C  
445 virus glycoprotein HEF for generation of vesicular stomatitis virus pseudotypes. *J Gen Virol* 86: 1455-1465

446 Hoffmann M, Kleine-Weber H, Schroeder S, Krüger N, Herrler T, Erichsen S, Schiergens TS, Herrler G, Wu N-  
447 H, Nitsche A *et al* (2020) SARS-CoV-2 Cell Entry Depends on ACE2 and TMPRSS2 and Is Blocked by a  
448 Clinically Proven Protease Inhibitor. *Cell* 181: 271-280.e278

449 Hoffmann M, Müller MA, Drexler JF, Glende J, Erdt M, Gützkow T, Losemann C, Binger T, Deng H,  
450 Schwegmann-Weßels C *et al* (2013) Differential Sensitivity of Bat Cells to Infection by Enveloped RNA  
451 Viruses: Coronaviruses, Paramyxoviruses, Filoviruses, and Influenza Viruses. *PLoS one* 8: e72942

452 Højen JF, Rasmussen TA, Andersen KL, Winckelmann AA, Laursen RR, Gunst JD, Møller HJ, Fujita M,  
453 Østergaard L, Sjøgaard OS *et al* (2015) Interleukin-37 Expression Is Increased in Chronic HIV-1-Infected  
454 Individuals and Is Associated with Inflammation and the Size of the Total Viral Reservoir. *Molecular*  
455 *medicine (Cambridge, Mass)* 21: 337-345

456 Iyer AS, Jones FK, Nodoushani A, Kelly M, Becker M, Slater D, Mills R, Teng E, Kamruzzaman M, Garcia-  
457 Beltran WF *et al* (2020) Dynamics and significance of the antibody response to SARS-CoV-2 infection.  
458 *medRxiv*: 2020.2007.2018.20155374

459 Johnson M, Wagstaffe HR, Gilmour KC, Mai AL, Lewis J, Hunt A, Sirm J, Bengt C, Grandjean L, Goldblatt D  
460 (2020) Evaluation of a novel multiplexed assay for determining IgG levels and functional activity to SARS-  
461 CoV-2. *bioRxiv*: 2020.2007.2020.213249

462 Ju B, Zhang Q, Ge J, Wang R, Sun J, Ge X, Yu J, Shan S, Zhou B, Song S *et al* (2020) Human neutralizing  
463 antibodies elicited by SARS-CoV-2 infection. *Nature* 584: 115-119

464 Kirkcaldy RD, King BA, Brooks JT (2020) COVID-19 and Postinfection Immunity: Limited Evidence, Many  
465 Remaining Questions. *Jama* 323: 2245-2246

466 Le Bert N, Tan AT, Kunasegaran K, Tham CYL, Hafezi M, Chia A, Chng MHY, Lin M, Tan N, Linster M *et al*  
467 (2020) SARS-CoV-2-specific T cell immunity in cases of COVID-19 and SARS, and uninfected controls. *Nature*  
468 584: 457-462

469 Long Q-X, Liu B-Z, Deng H-J, Wu G-C, Deng K, Chen Y-K, Liao P, Qiu J-F, Lin Y, Cai X-F *et al* (2020a) Antibody  
470 responses to SARS-CoV-2 in patients with COVID-19. *Nature medicine* 26: 845-848

471 Long Q-X, Tang X-J, Shi Q-L, Li Q, Deng H-J, Yuan J, Hu J-L, Xu W, Zhang Y, Lv F-J *et al* (2020b) Clinical and  
472 immunological assessment of asymptomatic SARS-CoV-2 infections. *Nature medicine* 26: 1200-1204

473 Lv H, Wu NC, Tsang OT-Y, Yuan M, Perera RAPM, Leung WS, So RTY, Chan JMC, Yip GK, Chik TSH *et al* (2020)  
474 Cross-reactive antibody response between SARS-CoV-2 and SARS-CoV infections. *bioRxiv : the preprint*  
475 *server for biology*: 2020.2003.2015.993097

476 Mateus J, Grifoni A, Tarke A, Sidney J, Ramirez SI, Dan JM, Burger ZC, Rawlings SA, Smith DM, Phillips E *et al*  
477 (2020) Selective and cross-reactive SARS-CoV-2 T cell epitopes in unexposed humans. *Science (New York,*  
478 *NY)*: eabd3871

479 Peng Y, Mentzer AJ, Liu G, Yao X, Yin Z, Dong D, Dejnirattisai W, Rostron T, Supasa P, Liu C *et al* (2020) Broad  
480 and strong memory CD4+ and CD8+ T cells induced by SARS-CoV-2 in UK convalescent individuals following  
481 COVID-19. *Nature immunology*

482 Pinto D, Park Y-J, Beltramello M, Walls AC, Tortorici MA, Bianchi S, Jaconi S, Culap K, Zatta F, De Marco A *et*  
483 *al* (2020) Cross-neutralization of SARS-CoV-2 by a human monoclonal SARS-CoV antibody. *Nature* 583: 290-  
484 295

485 Qu J, Wu C, Li X, Zhang G, Jiang Z, Li X, Zhu Q, Liu L (2020) Profile of Immunoglobulin G and IgM Antibodies  
486 Against Severe Acute Respiratory Syndrome Coronavirus 2 (SARS-CoV-2). *Clinical Infectious Diseases*

487 Robbiani DF, Gaebler C, Muecksch F, Lorenzi JCC, Wang Z, Cho A, Agudelo M, Barnes CO, Gazumyan A,  
488 Finkin S *et al* (2020) Convergent antibody responses to SARS-CoV-2 in convalescent individuals. *Nature* 584:  
489 437-442

490 Rogers TF, Zhao F, Huang D, Beutler N, Burns A, He W-t, Limbo O, Smith C, Song G, Woehl J *et al* (2020)  
491 Isolation of potent SARS-CoV-2 neutralizing antibodies and protection from disease in a small animal  
492 model. eabc7520

493 Sekine T, Perez-Potti A, Rivera-Ballesteros O, Strålin K, Gorin J-B, Olsson A, Llewellyn-Lacey S, Kamal H,  
494 Bogdanovic G, Muschiol S *et al* (2020) Robust T cell immunity in convalescent individuals with  
495 asymptomatic or mild COVID-19. *Cell*

496 van der Heide V (2020) SARS-CoV-2 cross-reactivity in healthy donors. *Nature Reviews Immunology* 20: 408-  
497 408

498 Vibholm LK, Nielsen SSF, Pahus MH, Frattari G, Andersen R, Monrad I, Andersen AHF, Thomsen M  
499 (Submitted Oct. 2020) SARS-CoV-2 persistence is associated with antigen specific CD8 T-cell responses. *Cell*  
500 *Reports Medicine*

501 Walls AC, Park Y-J, Tortorici MA, Wall A, McGuire AT, Velesler D (2020) Structure, Function, and Antigenicity  
502 of the SARS-CoV-2 Spike Glycoprotein. *Cell* 181: 281-292.e286

503 WHO, 2020a. Coronavirus Disease 2019 (COVID-19), Situation Report 51. World Health Organization,  
504 who.int.

505 WHO, 2020b. Coronavirus disease (COVID-19) - Situation reports, Weekly Epidemiological Update 5 Oct.  
506 World Health Organization, who.int.

507 WHO (2020.) Newsroom - 172 countries and multiple candidate vaccines engaged in COVID-19 vaccine  
508 Global Access Facility.

509 Wu F, Wang A, Liu M, Wang Q, Chen J, Xia S, Ling Y, Zhang Y, Xun J, Lu L *et al* (2020) Neutralizing antibody  
510 responses to SARS-CoV-2 in a COVID-19 recovered patient cohort and their implications.  
511 2020.2003.2030.20047365

512 Yang L-T, Peng H, Zhu Z-L, Li G, Huang Z-T, Zhao Z-X, Koup RA, Bailer RT, Wu C-Y (2006) Long-lived  
513 effector/central memory T-cell responses to severe acute respiratory syndrome coronavirus (SARS-CoV) S  
514 antigen in recovered SARS patients. *Clinical immunology (Orlando, Fla)* 120: 171-178

515 Zhang F, Gan R, Zhen Z, Hu X, Li X, Zhou F, Liu Y, Chen C, Xie S, Zhang B *et al* (2020) Adaptive immune  
516 responses to SARS-CoV-2 infection in severe versus mild individuals. *Signal Transduction and Targeted*  
517 *Therapy* 5: 156

518 Zhou P, Yang X-L, Wang X-G, Hu B, Zhang L, Zhang W, Si H-R, Zhu Y, Li B, Huang C-L *et al* (2020) A  
519 pneumonia outbreak associated with a new coronavirus of probable bat origin. *Nature* 579: 270-273  
520

521 **Figure titles and legends**

522 **Figure 1: Extensive IgG and IgA presence with multiple SARS-CoV-2 antigens.**

523 **A+B)** Serum IgG levels for all individuals and 10 pre-pandemic healthy controls. IgG was detected against  
524 SARS-CoV-2 Spike, RBD (receptor binding domain), NTD (N-terminal domain), nucleocapsid and non-  
525 SARS-CoV-2 spike proteins of other corona virus. Data are blank-corrected electro chemiluminescent signal  
526 measured by MSD multiplex serology assays. **C)** Serum IgA levels for all individuals and eight pre-  
527 pandemic healthy controls, measured by ELISA. IgA is shown as a ratio against a standard calibrator. **D+E)**  
528 Distribution of IgG volumes between each disease severity group, for both SARS-CoV-2 spike (D) and  
529 nucleocapsid (E). Data are blank-corrected electro chemiluminescent signal measured by MSD multiplex  
530 serology assays. Scatter plots with individual data points are shown with median (wide line) and interquartile  
531 range (narrow lines). Statistical comparison between groups were done by Mann-Whitney U test. n.s = not  
532 significant, \* =  $p < 0.05$ , \*\*\*\* =  $p < 0.0001$ , n = 203.

533 **Figure 2: SARS-CoV-2 neutralization capacity correlates with disease severity. A)**

534 Representative neutralization curves for control ID308, and individuals ID54, ID194, and ID203, quantified  
535 as eGFP<sup>+</sup> cells by flow cytometry. Control plasma was unable to neutralize below a 50% infection rate,  
536 where SARS-CoV-2 recovered patients accomplish 100% neutralization at the lowest plasma dilution. X-  
537 axis shows the log<sub>10</sub> transformed patient plasma dilution, from 1:25 – 1:1,953,125. Error bars represent  
538 mean and s.e.m. of duplicate determinations. Three-parameter non-linear fit is plotted. **B)** IC<sub>50</sub> values  
539 calculated from neutralization curves, graphed from lowest (left) – highest (right) within the cohort. Error  
540 bars show 95% confidence interval. Nine individuals unable to neutralize 100% are represented with the  
541 value zero on the y-axis far left, n = 202. **C)** Distribution of IC<sub>50</sub> values between disease severities. Scatter  
542 plot with individual data points shown with median (wide line) and interquartile range (narrow lines).  
543 Statistical comparison were by Mann-Whitney U test. \*\*\* =  $p < 0.001$ , \*\*\*\* =  $p < 0.0001$ , n = 193.

544 **Figure 3: SARS-CoV-2 antibody quantification by ACE2 competition assay.**

545 **A)** Schematic drawing of the MSD ACE2 competition assay. Spike-specific serum antibodies bind to their  
546 respective epitopes, blocking SULFO-Tag conjugated ACE2. Antibody concentration in ng/ml is calculated  
547 based on internal standard antibody blocking ACE2 binding. **B)** Serum ACE2 blocking antibody levels  
548 detected against SARS-CoV-2 Spike and RBD, and SARS-CoV-1 spike proteins. Scatter plot with individual  
549 data points shown with median (wide line) and interquartile range (narrow lines). Statistical comparison by  
550 Mann-Whitney U test. \*\*\* =  $p < 0.001$ , \*\*\*\* =  $p < 0.0001$ ,  $n = 203$ . **C)** Distribution of SARS-CoV-2 spike  
551 specific ACE2 blocking antibodies between disease severity groups. Scatter plot with individual data points  
552 shown with median (wide line) and interquartile range (narrow lines). Statistical comparison by Mann-  
553 Whitney U test. \*\*\* =  $p < 0.001$  \*\*\*\* =  $p < 0.0001$ ,  $n = 203$ . **D)** Correlation analysis of pseudotype virus  
554 neutralization IC50 values and the quantity of SARS-CoV-2 spike specific ACE2 blocking antibodies.  
555 Correlation by Spearman's rank coefficient,  $p < 0.0001$ .  $n = 193$ .

556 **Figure 4: The breadth of immunological response shifts in conjunction with neutralization capacity.**

557 Presentation of all IC50 values listed from lowest (left) to highest (right) with a heatmap representing the  
558 individuals corresponding relative IgG levels and ACE2 blocking antibody quantities collected through MSD  
559 analysis. The normalization of variables within each measured immunological parameter was performed by  
560 assigning the highest values to one (bright yellow) and the lowest value to zero (dark blue).  $n=202$ .

561 **Figure 5: Characterization of CD8<sup>+</sup> T-cell responses towards SARS-CoV-2 in HLA-A2<sup>+</sup> individuals.**

562 **A)** Overview of HLA-A2<sup>+</sup> epitope location within the SARS-CoV-2 proteins. **B).** Epitope sequence and  
563 individual dextramer signal gating strategy on CD8<sup>+</sup> T cells, with the percentage of recognition within the  
564 cohort shown for each. Full gating strategy is displayed in Appendix Fig 2. **C)** The frequency of SARS-CoV-  
565 2 responsive CD8<sup>+</sup> T-cells for each epitope. Scatter plot with individual data points shown with median  
566 (wide line) and interquartile range (narrow lines).  $n = 106$  **D)** Breadth of CD8<sup>+</sup> T-cell responses shown as the  
567 cumulative number of CD8<sup>+</sup> T-cell epitopes targeted by patients. Percentage equivalents of patient numbers  
568 are indicated on top of the bars for each cumulative group.  $n = 106$  **E)** Distribution of the cumulative CD8<sup>+</sup>  
569 T-cell responses in HLA-A2<sup>+</sup> individuals, between the disease severity groups. Error bars show median

570 (wide line) and interquartile range (narrow lines). n=106. 10% of individuals had no detectable CD8<sup>+</sup> T-cell  
571 epitope response, and are not shown on the graph but were included in statistical tests. Statistical comparison  
572 by Mann-Whitney U test. n.s. =  $p > 0.05$ .

### 573 **Tables and their legends**

#### 574 **Table 1: Cohort characteristics.**

575 All individuals were assigned a COVID-19 severity group depending on their course of disease. Group 1  
576 consisted of asymptomatic individuals with no limitations in their daily activities. Group 2 of moderately  
577 sick, able to recover at home. Finally, group 3 comprises all hospitalized individuals, including those  
578 with/without oxygen requirement and/or ICU admission.

| <b>Table 1: Demographics and Clinical Characteristics at Baseline</b>     |              |
|---------------------------------------------------------------------------|--------------|
| <b>Characteristics</b>                                                    | <b>n=203</b> |
| Age, years, median (range)                                                | 47 (21-79)   |
| Female sex, no (%)                                                        | 92 (45)      |
| HLA-A2 <sup>+</sup> , no (%)                                              | 113 (56)     |
| COVID-19 disease severity, no (%)                                         |              |
| 1. Home/outpatient, no limitation of daily activities (asymptomatic/mild) | 17 (8)       |
| 2. Home/outpatient, limitation of daily activities (moderate)             | 152 (75)     |
| 3. Hospitalized (severe)                                                  | 34 (17)      |
| Duration of COVID-19 symptoms, days, median (range)                       | 13 (0-68)    |
| Time from recovery to inclusion, day, median (range)                      | 31 (14-61)   |

579

#### 580 **Table 2: Cumulative CD8<sup>+</sup> T-cell responses in correlation to serology.**

**Table 2: Correlations to cumulative epitope specific CD8+ T-cell responses**



| <b>Immunological parameter</b>                  | <b>r-value</b> | <b>p-value</b> |
|-------------------------------------------------|----------------|----------------|
| IC50 values                                     | 0.2542         | 0.0107         |
| SARS-CoV-2 Spike ACE2 Blocking antibodies ng/mL | 0.2906         | 0.0147         |
| SARS-CoV-2 RBD ACE2 Blocking antibodies ng/mL   | 0.3057         | 0.0101         |
| SARS-CoV-2 Spike IgG                            | 0.2659         | 0.0261         |
| SARS-CoV-2 RBD IgG                              | 0.2704         | 0.0236         |
| SARS-CoV-2 N-Terminal Domain IgG                | 0.2918         | 0.0143         |
| SARS-CoV-2 Nucleocapsid IgG                     | 0.2102         | 0.0807         |

581 Spearman's rank coefficient correlations displaying the relationship between the overall magnitude of CD8<sup>+</sup>  
582 T-cell responses to SARS-CoV-2 epitopes, and antibody neutralization, quantity and ACE2 blocking  
583 capacity, for all SARS-CoV-2 antigens investigated.

584

585

586

587

588

589

590

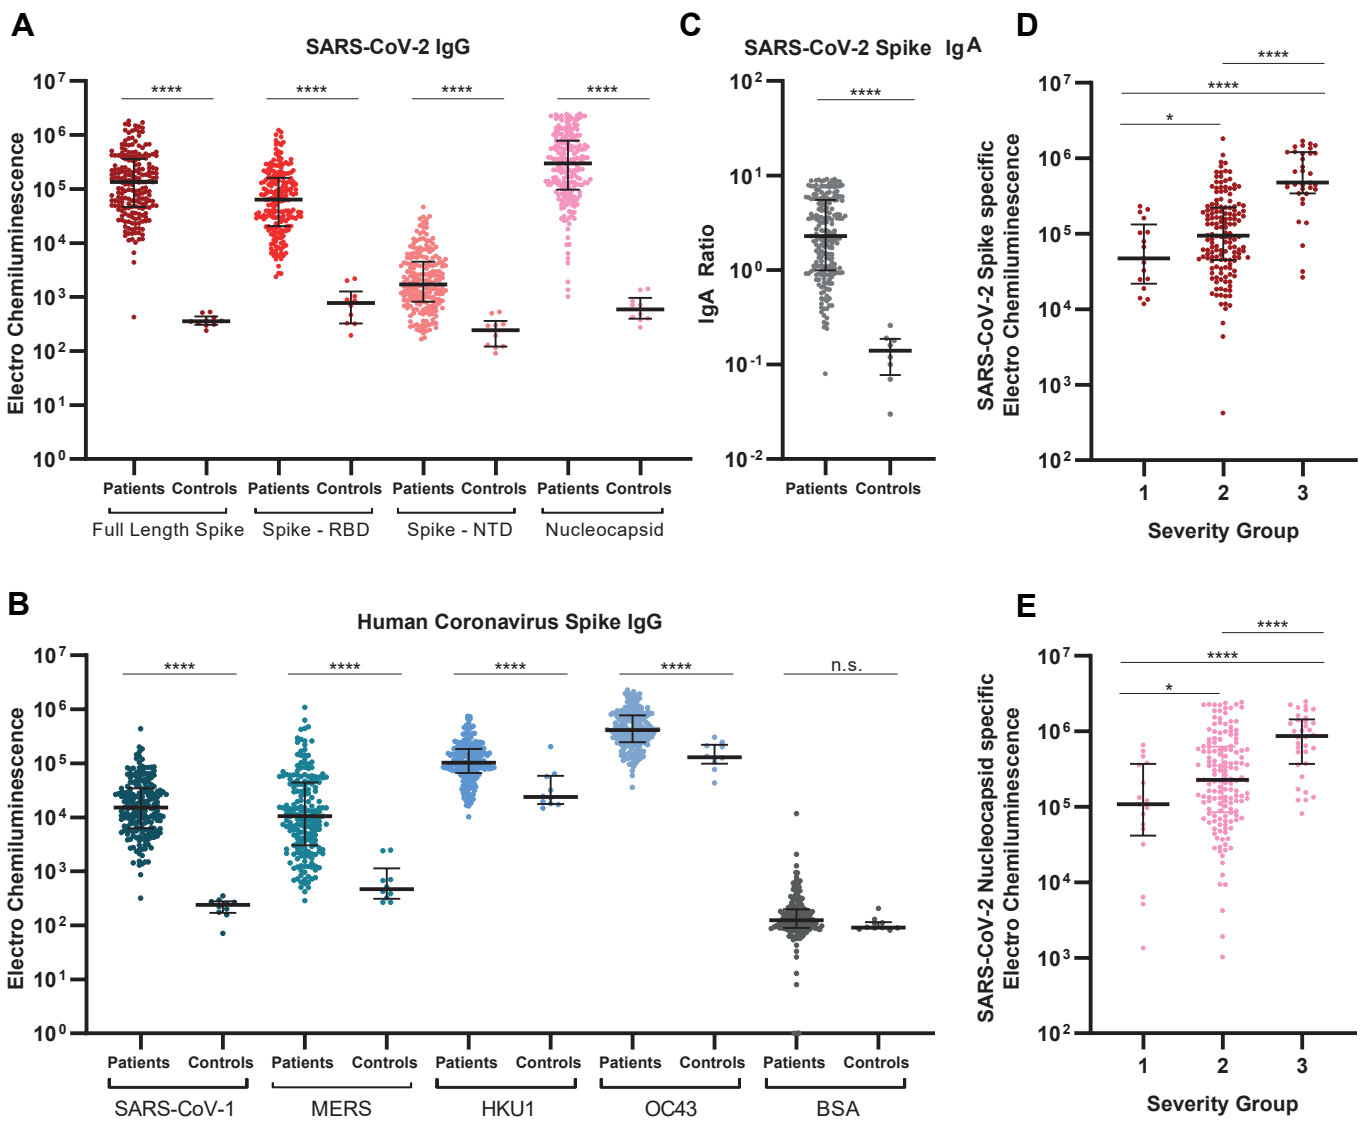

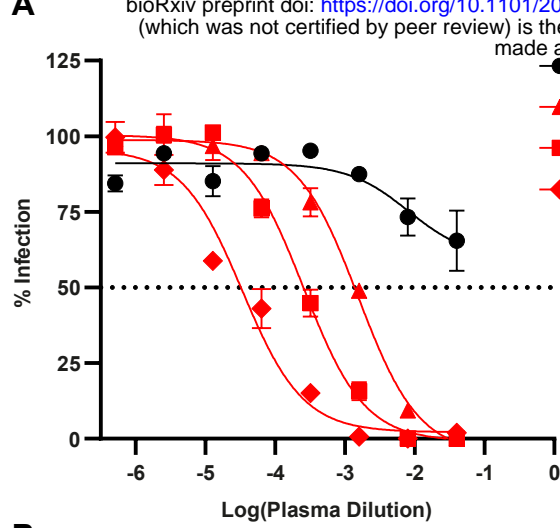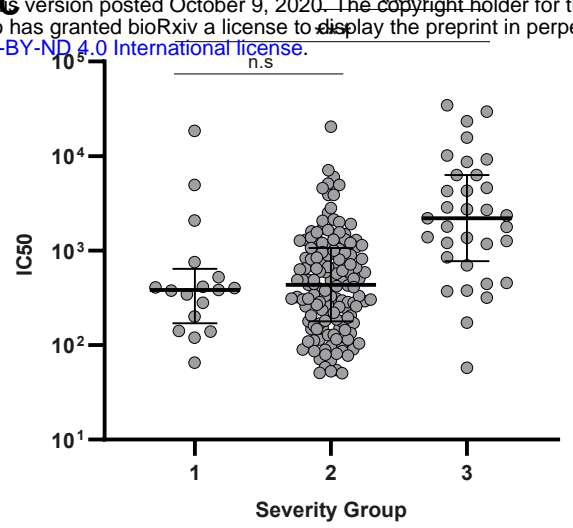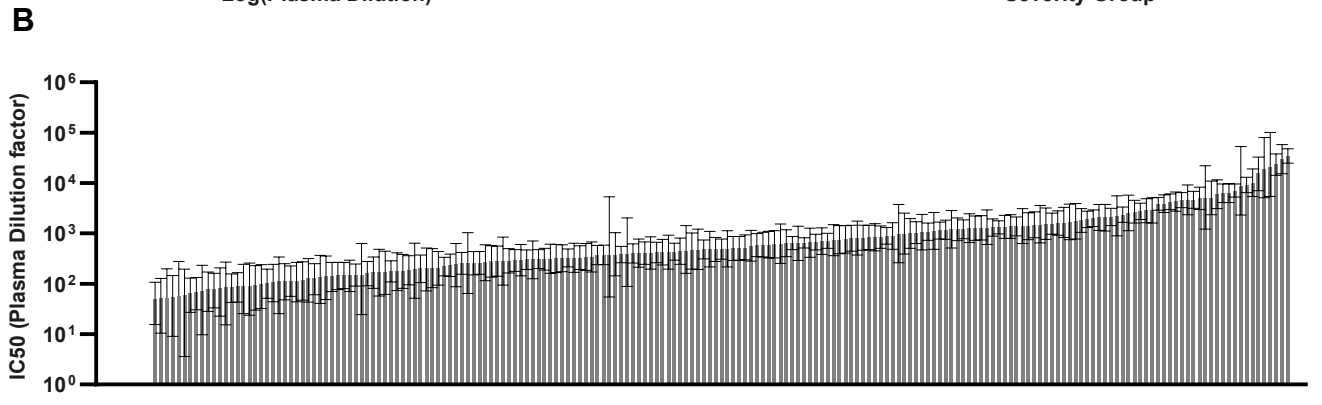

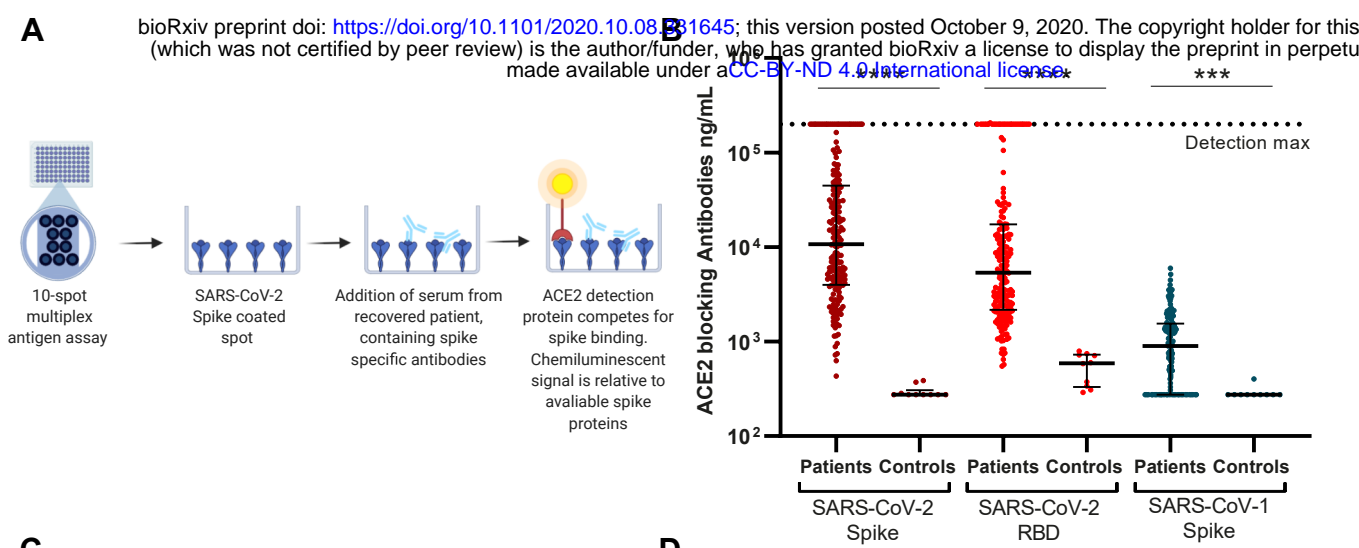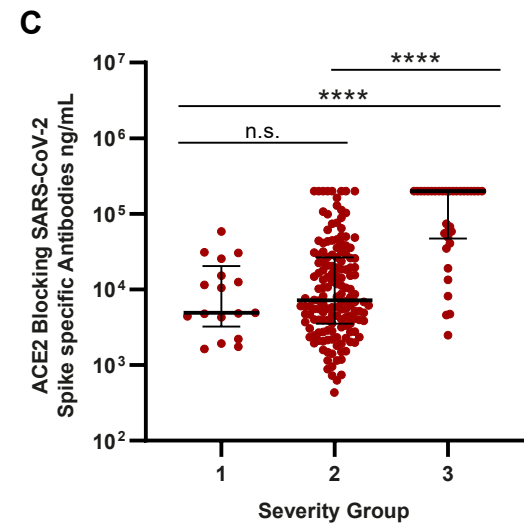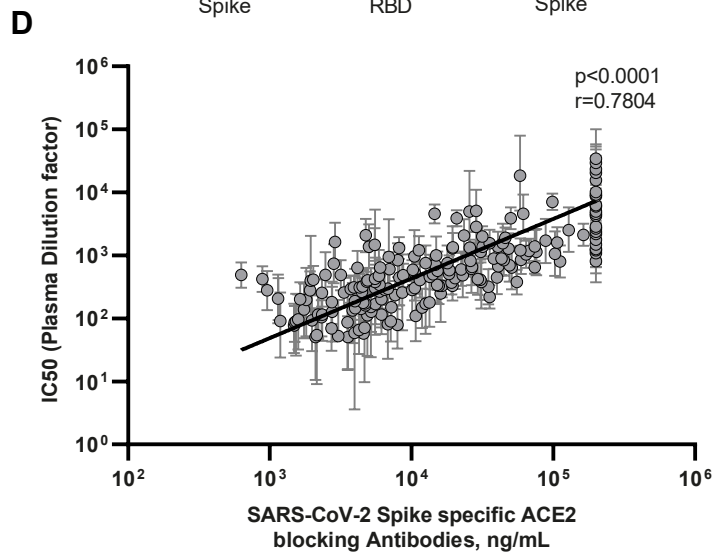

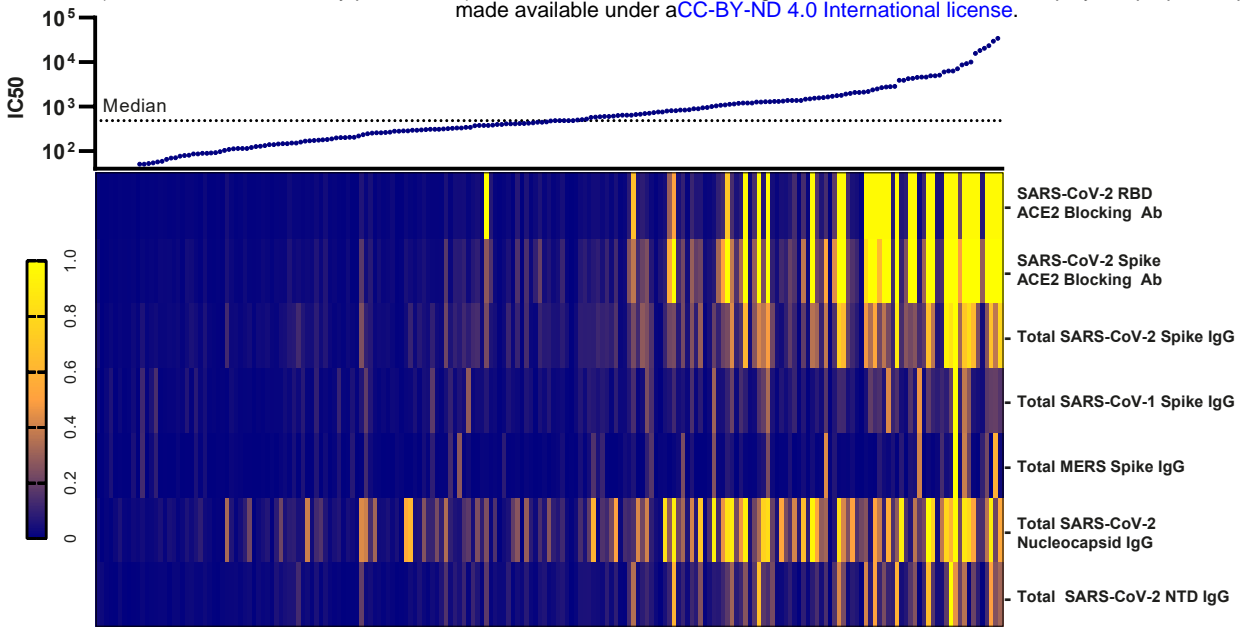

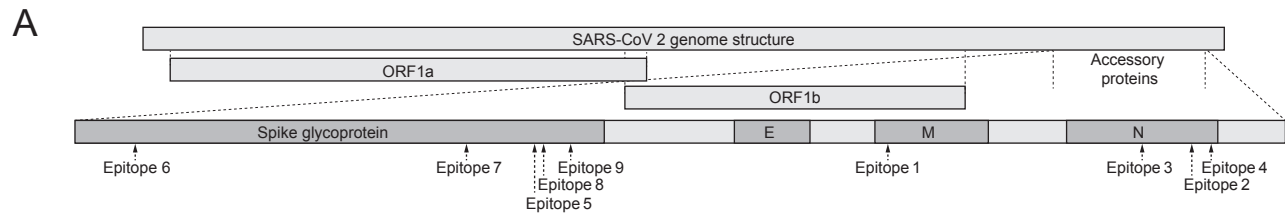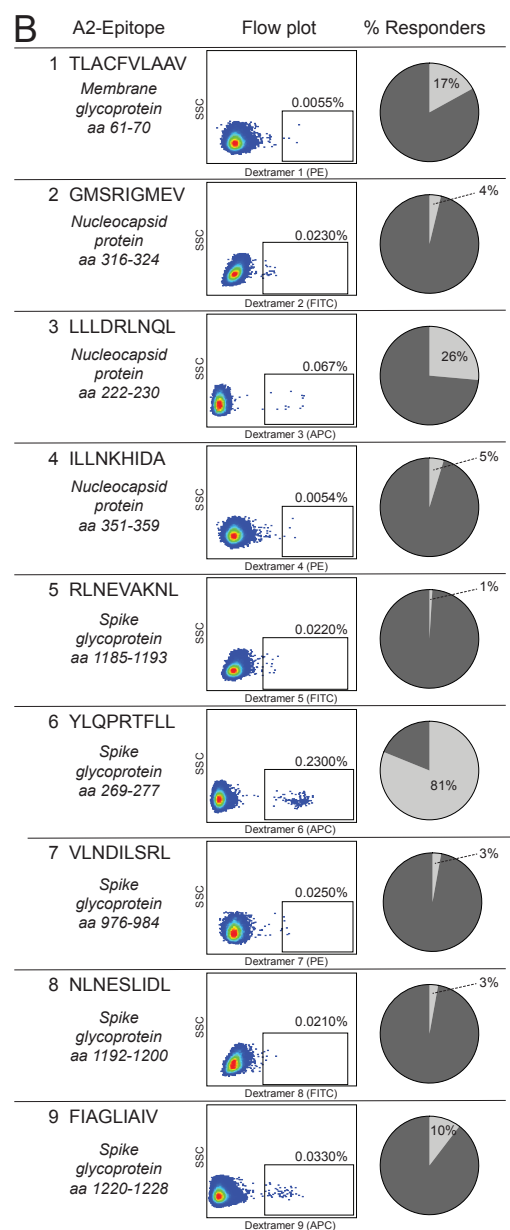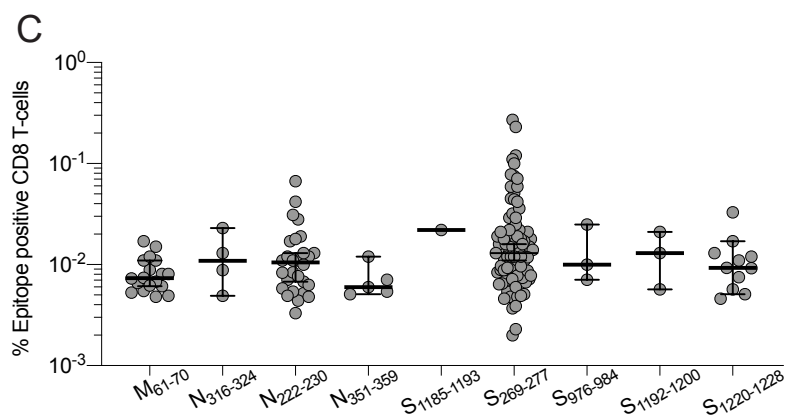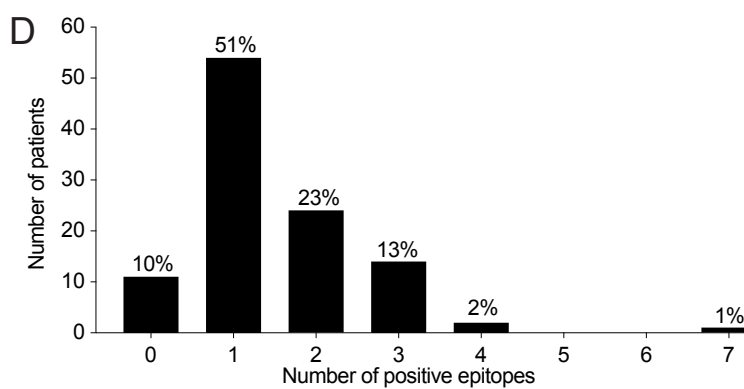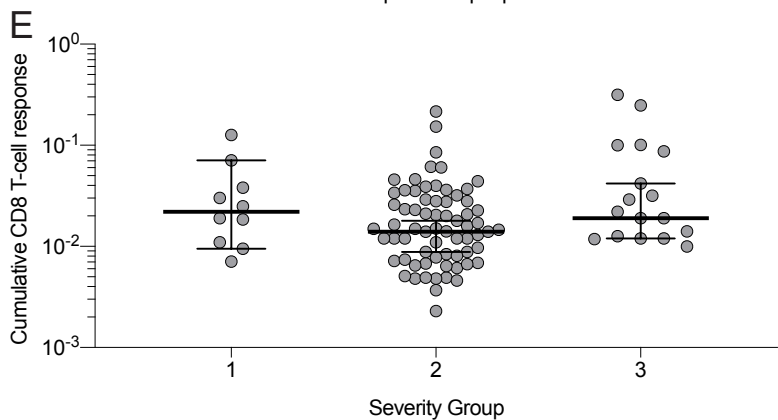

Source: https://www.biorxiv.org/content/10.1101/2020.10.08.331645v1.full.pdf
